# Supplementary material
Source: Springer Nature journal article supplement (https://www.springermedizin.de/resource/supplementary/12879_2013_2978_MOESM3_ESM.pdf/9446108)

(A)

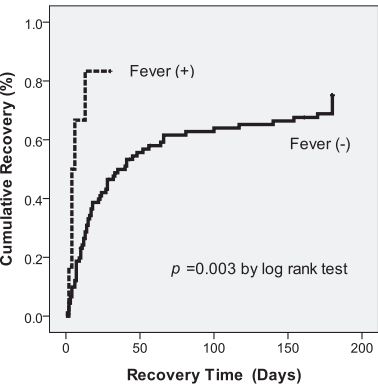

(B)

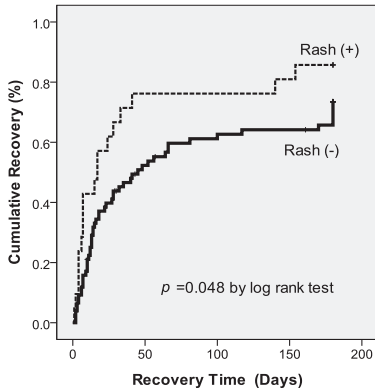

(C)

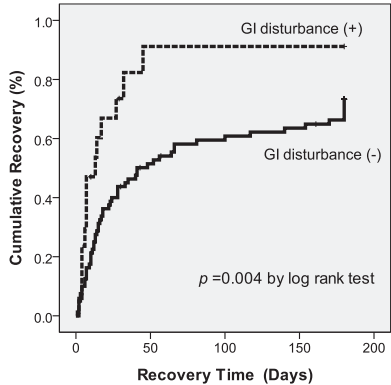

Supplement: MOESM3 [file 9446108]
